# Supplementary material for: Interpretive autonomy at the heart of classical musicians’ learning and well-being: the role of professional education
Source: Front Psychol. 2025 May 19;16:1543268. doi: 10.3389/fpsyg.2025.1543268 (PMC12127368; doi:10.3389/fpsyg.2025.1543268)
Supplement: Supplementary file 1 [file Table_1.xlsx]

## Sheet: Learning experiences
Need-thwarting learning experiences in lessons			Basic psychological needs	Need-supportive learning experiences in lessons				Need-thwarting learning experiences in practice			Basic psychological needs	Need-supportive learning experiences in practice				Need-thwarting learning experiences in performance			Basic psychological needs	Need-supportive learning experiences in performance
Theme	Code	Example of Quotes		Theme	Code	Example of Quotes		Theme	Code	Example of Quotes		Theme	Code	Example of Quotes		Theme	Code	Example of Quotes		Theme	Code	Example of Quotes
Discouragement to develop original interpretation	Original interpretive ideas being criticized	When I tried to make the music more interesting, the teacher rejected my ideas. He was quite the opposite of my first teacher, and when I played with superficial or obvious expressions, he said, "It’s unnatural." … In every lesson, I did my best to understand what the teacher wanted, though. [E]	Competence	Encouragement to develop original interpretation	Original interpretive ideas being accepted	Her teaching is like, when you bring a piece to her, she wouldn't interfere with what you think, like what your idea is too much. [F]		Not understanding the music	Not understanding a teacher's instructions	I didn't really understand what my teacher said, and even when my mom explained to me, I still didn't get it. So, I was frustrated. [D]	Competence	Developing personal understanding of the music	Enjoying sight-reading	At that age I didn't really feel like I was practicing. I was just playing for fun. … I enjoyed learning different pieces by myself. [E]		Receiving criticism after performance	Criticisms from expert audiences (teachers/juries/peers/parents)	And she said my Ravel is even worse than five years ago. She said, “When you first learned this piece, of course, they were not perfect. But they were still there. But right now, you just play worse than before. Just playing the notes.” Yeah, it's just very hurtful. [A]	Competence	Receiving praise after performance	Praise from audiences (living composers/teachers/juries/peers/parents/general audiences)	I think it's just that feeling when you receive comments like, “Oh, you play very differently from other people around you,” or like, “You don't sound like other students here.” And then you get like, you know, really a nice feeling. I normally take it as a compliment and that's like the compliment that I want to listen to the most. [F]
Imposed perfectionistic standards	Imposed technical and artistic perfection	She has high standards, so I think no matter how you play, she is still not satisfied. [A]			Encouraged to have personal interpretation	When I went to [B3 Teacher], he said something very important to me, which I always remember. His whole thing was trying to de-Zukermanize me. ... He has mannerisms and I would copy the mannerisms. So, he pointed that out. And I think the best thing [B3 Teacher] did for me was, he made me started thinking like [B] and not thinking like “Oh, what would Zukerman do.” [B]							Composing	I often composed when I was in the first or second grade. Sometimes I got advice from my father or I learned it by myself. … I think my compositions were in the style of Chopin or Burgmüller. [E]			Being eliminated in a competition	It was shocking because I listened to other performances, and I didn’t like them. Yes, I did make some mistakes, but I was confident that my music was better. … And my old teacher was there, and her student advanced to the next round. But I didn’t like her performance either. … My old teacher was touched by my performance and said “Congratulations!” after the performance. It was before the result…
Ineffective communication	Little or no demonstration	She will sing like, “What you play is Dadadada.” Like, she will sing very ugly, imitating what you played. Then, she will sing what she wants. If she wants a melody to be played with beautiful phrasing, then she will just sing that. ... She won't show you on the piano what Scriabin wanted. So, it's very hard in that way. ... I cannot really understand what she wants. So, a lot of times I have to …		Effective communication	Demonstration	Well, the first teacher in [H1 City] often demonstrated on the piano. And his playing was always so beautiful. I was so touched by their performances that it made me think, "This is what music is." [H]							Working with a living composer	―What about when you're working with a modern piece that doesn't have any sound references? So, like a freshly written piece then in that case. And then, you know, you get the music and you sort of try to learn it and understand the rhetoric of the music. And then you work with the composer and see what the composer thinks. And there's always room for adjustment. Like composers a lot of time didn…		Limitation on interpretation	Feeling limited in interpretion to be accepted by juries	And, you know, I was fortunate to get the second prize in that. But I remember playing in a way that [pause]. It's not that I deliberately played in a way that I thought they would like, but I just remember feeling very self-conscious about whether what I was doing was correct or what I was doing was in good taste or acceptable, you know. I found it quite hard to be myself. And I'm sure I'm not a…	Autonomy	Encouragement to be flexible on stage	Playing improvisatory contemporary piece	So, I was playing with actors on the other day. And they had scores, but I basically had to improvise on the spot, reacting to what the actors were expressing. ... I was more aware of how I was feeling at that moment and tried to let whatever emotions, that was coming out, flow. [D]
	Too abstract verbal instruction	The teacher was always talking about abstract musical concepts, and I could not follow them at 13. I was still in the process of learning the fundamentals. [D]			Effective metaphors	She often used metaphors to express musical ideas like, "This part sounds like a clown is singing" and suggested ideas like, "Maybe you could think about it this way." [H]							Discovering a favorite piece	I heard one of my older sisters play this piece at that time. And then I just felt like, “Wow, this sounds so beautiful. Why does it sound that beautiful?” I think that time this piece was my favorite among all the other pieces. [A]			Pressure to conform to interpretive norms in general	I think interpretation is also limited too. ... Of course, everyone's going to sound different because we're not the same person. But they definitely expect a certain sort of sounding, you know. Like very virtuosic and dramatic, but nothing too out there. Nothing too crazy. So, there's definitely a very favored interpretation or a favored type of way of playing. And then if you can fit yourself i…
No skills provided to develop and express interpretation	Exclusive focus on technique	It was very common in the [G5 School] and indeed all [G6 Schools] to start young students on Handel's Sonatas. Because you know, technically they are not too demanding, and they allow you to practice a lot of technique as well. They are perfect works in that sense because they cover basics, and they are not too demanding musically. But, you know, I feel slightly sorry for Handel in a way, because…		Skills provided to develop and express interpretation	Discussing interpretation based on music scores	Based on all the markings on the score, he will try to make you think about how you will treat this music based on what you see on the markings. [A]							Discovering a musical role model	I think the most important thing is that Patricia Kopatchinskaja makes music that makes sense to me. Music makes structural sense, rhetorical sense. And her playing is really attention-grabbing. So it's never like she leaves you alone and lets you go on with your own imagination. Or like, if you are a passive audience, you might just fall asleep. I think her playing is just like she has explained…			Pressure to adhere to notations on the score	I think it [improvisation] should totally be encouraged, and something that I would want to improve or make a progress on. I think, you know, it's more about how far you can let yourself go mentally. Then, there's also the technical aspect. ... For composed music, people are telling you that you can only play what's on the score, so it doesn't give you the mental license, and the second, no one r…
	No technical support	I don't think she explained it step by step. … I didn't understand how I was supposed to play or how I should move my hand to make a better sound. [D]			Training techniques for expression	I mean, sometimes you know, he also talked about technique, of course. But that was to enable the right expression, you know. Let's say, if there's like a super lyrical passage, and then if I'm just playing it, he would say, “Oh, you should do this and that physically, so that way you could make the phrase longer, more lyrical, and more poetic.” [C]		Limited exploration in interpretation	Being instructed by a teacher to stick to instructions	Everything was micromanaged is the way I would describe. ―Did you actually practice only that!? That’s all I practiced. Because I wasn't given anything else, and I wasn't allowed to play anything else. ―Are you serious? Yes, yes. Because everything as I said was micro-managed to the point where you have to master one step at a time. [G]	Autonomy	Exploration in interpretation	Exposure to unconventional interpretation	Because they always do something very creative, fresh, different. And that's why a lot of people hate them actually. But all of them are more storyteller-like pianists. And yeah, they just speak through music. And yeah, they're not confined by traditional way of approaching classical music. [C]			Limited choice of edition	So, I think it's not right when people say, “Oh, the Auer edition is not authentic. It’s not accurate and it's a bad edition.” That’s not true at all. He knew Tchaikovsky better than anyone today would know Tchaikovsky. So, we mustn’t dismiss it. So, that’s another example, you know, of standardization of interpretations. Even down to the edition that we choose to use. And still, until today, I h…
	No reasons given behind instruction	―When he says, “So, try to play this longer" or like, "Try to fix this,” does he say why? Does he give reasons? No. That's why he can move on so quickly. [D]			Score analysis	I think one of the things that she does very well, which I'm not used to, is that she talks about the architecture of music. “Where's the peak of the music?” And then you kind of walk your way out around that. “How do I start the beginning?” Usually, people start the beginning too loud in most pieces, right? Because it's the beginning, you don't want to give everything away. Things like that. I t…			Being instructed by a parent all the time	Well, I often ended up fighting with my father. Like a battle. ―Over what? Like, I didn't want to accept his musical ideas, and I was like "I don't like that. I want to play like this." And I cried badly. [E]			Exposure to different interpretations of the same piece by the same or different musicians	And he will show me a lot of his favorite recordings and favorite pianists' playing. And he really likes to listen to a lot of music and a lot of pianists, who play the same piece. He will compare with different playing of the same piece. He shares me a lot of these kinds of things. [A]		External pressure to play "well"	Pressure from a teacher to play "well"	Most of the time, she said “Well, you play really bad.” She can't really understand why you play like this. The way she treats students is this kind of pushing ways, and negative ways to make students realize. For some students, if you put a lot of pressure on them, they can do better. But some students cannot stand it. So, I think this way is useful for some people, yeah. And not appropriate for…		No external pressure to play "well"	Encouraged to play freely from a teacher	Actually, my former teacher, who is the composer of the encore that I played for my master’s recital, texted me. And right before my master's recital, he just said, “All of your audiences are your friends, and they are coming to support you. So, you just play what you want. Just play bravely.” This made me so happy. [A]
No interpretive choices	Forced to accept teacher's interpretation	When it came to musical ideas, there were many things that I wanted to do. But, when I was at the early stage of development, I just wasn’t allowed to choose or shape the music in the way that I wanted. [G]	Autonomy	Interpretive choices	Allowed to make interpretative dicisions	When I played Mozart for her, she did mention something like “I really like how you played this, but I know people on the jury are going to have problems with it.” So, you know, she's very practical and very honest. She would tell you these things. And then it's up to you to make the decision, if you really want to play it like that. [F]							Learning improvisation	Like it would be really easy for me to improvise on Baroque music, since I had training on it. And I've heard people do it all the time. And then it's sort of like I have technical and mental license to improvise on the spot. [F]			Pressure to play "well" for a career	At conservatory, I started to become aware of how, if I don’t perform well, I am getting judged by my colleagues. … It influences who asks you to play together or what opportunities you get. You know, a conductor might be watching, and he might not put you in the first chair if he hears you playing badly in public, right? … And then what if other faculties happen to be there because they have the…			Non-expert audiences	It's very different from playing in school. It is more casual concert, and you share music with the people, whose professions are not music. You enjoy it more, I think. ... Because there is no pressure from the audience. If you play at school, at least you're playing for your colleagues and you will care how they think about your playing, right? ... They want to know how well you play. So, someti…
	Pressure to reproduce a prepared interpretation in performance	If you did something by mistake that was not how you prepared in the lesson, then that would be picked up. [G]			Encouraged to be spontaneous in performance	He told me that even though the music is pre-written, and we pre-decide the most of what we do, there is a lot of things that we need to decide on stage. [D]		External pressure to practice	Pressure to practice	Well I didn' t really want to practice. Also I was so tired coming back from school, and I was like, "I'm so sleepy. Why do I need to practice?" And then we fought. [D]		No external pressure to practice	No external pressure to practice	But I never remembered that my dad forced me to practice. [A]			Pressure to achieve technical perfection	I think it is important to have that perfection. … If you want to survive in this world as a pianist, yeah. It’s very cruel. [A]
	Music scores being presented as unnegotiable	Everything was pre-marked on the score already, and I just had to learn it that way. [G]			Open questions on interpretation	He always asks, “Why do you think Brahms or Chopin wrote this way?” And, of course, I was like too young to have answers for that. But definitely, yeah. [C]			Being watched by a parent or peers	So, you always hear other people, and there was that constant subconscious comparison going on all the time. All the time. [G]							Being overwhelmed by competitive peers	And then, in a master’s, still like the same concerns at the beginning. Also, some of the technical concerns came up again, because like I was in a place like [D5 Conservatory] where people were so good. Like some people. And I'm just like, “Oh I'm not good enough technically.” Like, “I’m so inaccurate, what do I do?” that kind of feeling. [D]
	"Micromanaged" technically	And doing it through a really, really disciplined and systematic methodology that you would start only by doing scales in whole notes with open strings then you would do four notes in a bow legato then eight notes then six-teenth or whatever. Everything was micromanaged is the way I would describe. [G]			Alternative interpretation or technique being suggested	He always told me, “Oh, this part, if you play like this, it will sound very interesting. If you try this sound and play this voice a little bit more or something like that, it will sound very interesting, or it will sound very good.” [A]		Damaging relationships through practice	Fighting with a parent in practice	I practiced about three hours around that time [from at the age of 5 to 10]. I didn’t practice all the way through, though. I was fighting with my mom maybe for one hour and a half. [D]	Relatedness	Building relationships through practice	Enjoying chamber music rehearsals	I think the first one was probably [B1 Music Festival], where we were playing a lot of chamber music, and everyone was just talking about music. And obviously the other stuff, like there was table tennis there, and there was like charades, and it was just a nice, fun environment. But just playing with other people, I just really really liked doing that. [B]		Performance-contingent relationships	"Unspoken judgement" among peers	I don’t know, but that level of judgment―unspoken judgement and comparative education where you are always being compared to or benchmarked against other students―is just not helpful. And I am certainly opposed to that environment. I don’t think it’s good for developing musicians at all. You might become a superb technician, and you might become a really fine instrumentalist, but I just wonder wh…	Relatedness	Feeling connected through performance	Supportive peers	Because everyone is really focused on their own things, so, in a way, no one is really paying that much attention to you. So, you just sort of make your own progress. But people are really friendly with each other. Really supportive. It's a really healthy environment, I would say, yeah. [F]
Inflexible lesson plans	No choice on pieces	Yes, of course, pieces came into the repertoires as well. But everything was very carefully structured. ... There was always a technical purpose in every piece. Every piece of repertoire they gave you was always tied to where you were in terms of your stage of development technically. [G]		Flexible lesson plans	Choices on pieces	One of the pieces that I always remember playing with [G3 Teacher] was Bach Double Concerto. That was, of course, a push at the time. I definitely wasn't technically ready to play that piece. But I think I just loved the music so much that I found a way to get through it and enjoyed specially playing it with [G3 Teacher] at the end of lessons. He would sort of reserve it as a treat at the end of …											Social hierarchy based on achievements	―Would you say there was a hierarchy in the school? Yeah, yeah. Depending on who was the best. ―Best in terms of technique? In terms of technique. I mean it was always very clear who was at the top. ―How do you know? From performances? From their performances. And everyone would register that when they attended the performances, and they would say “Oh my god. That performance was amazing” and tha…			Interaction with an audience	Actually, there's one person who asked me after the concert. ... She asked me like, “Can you explain why it sounds so different?" ... And I just said, “Because it uses a pentatonic scale, and there are so many different colors because of this scale.” ... They seemed to like it a lot actually. Actually, it makes me very happy. [A]
	Not allowed to have lessons with others	Also, one reason why I maybe also started to feel less secure is that I also, for the first time in my life, was forced to only have just one teacher. ... So, the consequence of that was maybe I suddenly felt a little bit unsettled that I lost a comforting figure in my violin life. So, now in this school, boarding and with one teacher, and one very strict teacher, I had to do everything in her wa…			Having other helpful teachers/mentors	I also have a really good friend slash mentor, who's in the [B1 Orchestra] [B].											Feeling isolated after performance	After the concert, I felt like everyone else were friends, and I thought, "I’m not part of this group." [D]
	Excessive amount of lessons	I had two lessons a week. So, I had two lessons with [G8 Teacher], one hour each. So, two hours with her a week and two hours with her assistants. ... So, they would teach exactly the same, aligned with the main professor. [G]
Unrelatable personality	Lack of interest in teaching or student	She was, I think, in her late 30s, when I went to her. So, I think she still had some sort of artistic pursuit or she still had ambitions. But then, I think as the years progressed, her ambitions shifted toward, you know, making progress in her position within the school, and gaining more recognitions, and, you know, stuff like that as well as politically. So, naturally, there was less attention …	Relatedness	Relatable personality	A teacher being their "mom"/"mentor"/"best friend"/"father"/"god father"	So, we have a very strong bond between us. He's basically my musical godfather. So, he definitely had, I would say, the most influence on me as a musician. And, we had a lot of time together outside of school as well. So, basically he taught me life. [C]
	More emphasis on short-term achievements than long-term personal development	But he's very good at preparing people for competitions and making performances that are very -I don't know if this is the word-inoffensive. ... He has a lot of competition winners and his students all excel technically. But a lot of them, I have to say, are not very emotionally interesting. And that's because he just focuses on something entirely different, and his entire purpose of music is a l…			More emphasis on long-term personal development than short-term achievements	And it's all about building your confidence as a person and as a musician. I think those two are the qualities that are far more important than playing "well" and playing like you would score a perfect score in a competition. I don't think those are the qualities that she is looking for. And then hopefully through that process, this community process, you would at some time blossom and make a bre…
	Explosive temper	In the early stages of my lessons with [G8 Teacher], you know, her temper could just be set off at any minute. She was so unpredictable, and that's I think what I was most scared at that age. I didn't know how she would react to what I was trying to do in the lesson. And there were moments where she would just explode and start to raise her voice and get angry at me, and all of these certainly in…			Maintained support after graduation	Until now, she's still very supportive, no matter. When I win a competition or whenever I have a concert, she always asked me to send her videos and send the information to her. Then she will post it in her class. She says that she's very proud of me. [A]
Authoritarian class management	Monotony in students' interpretations in a studio	At the early stage of development, her students will sound quite similar. Because, you know, when you are holding the violin in exactly the same way, and using the bow in exactly the same way with the same bow hold along with the use of exactly the same fingerings etcetera, etcetera. It’s pretty inevitable that you are going to sound the same. I’d say though no matter how much you try to micro-ma…		Democratic class management	Diversity in students' interpretations in a studio	She doesn't interfere with people's interpretations at all. Because she wants all her students to sound different. And she's not a fan of like, you know, everyone's sounding the same or having the same qualities. She doesn't believe in that as well. [F]
	Promoting competition in a studio	We are very supportive to each other, but under a certain level, I feel like we are competing each other. Even though it’s not obvious. But we are very hard working, and especially my studio is the most competitive studio in the piano department. So, everyone is very hard working, and they will hear each other’s playing, and under a certain circumstances, we are competing. [A]			Building a supportive community in a studio	So, I think her main focus in teaching is to provide you a community. So, her teaching philosophies are all about building the studio, building the school as a whole community, so that it gives you support and you sort of learn at the same time, as well as giving back to the community. And then you learn in that process as well. [F]
	Humiliation in a studio class	One time, both me and another student had a competition coming up during my first year of master's. We would leave for a competition very soon, and after we played she just said, “You know, I'm speechless.” And then she said a lot of words. Even though she's speechless, she still said a lot of bad words. ... "I just don't know what you are playing. Shame on you to hear you play like that.” Yeah, …			Providing helpful performance opportunities	―And did you have a studio class with [F2 Teacher]? Yeah. Very steadily every week and really helpful. And then at the end, she would listen to it one more time with the piano. And then, that's like then you finish studying the piece with her. So, through that process, she gives you a lot of support and confidence, because you know when you do this like over and over, you feel like “Oh, after pla…
